# Supplementary material
Source: MDPI journal article supplement (https://www.mdpi.com/2673-7426/2/1/5)
Supplement: s1 [file s1]

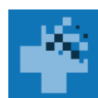

# Supplementary Materials: Curcumin Analogues as a Potential Drug against Antibiotic Resistant Protein, $\beta$ -Lactamases and L, D-Transpeptidase Involved in Toxin Secretion in *Salmonella typhi*: A Computational Approach

Tanzina Akter, Mahim Chakma, Afsana Yeasmin Tanzina, Meheadi Hasan Rumi, Mst. Sharmin Sultana Shimu, Md. Abu Saleh, Shafi Mahmud, Saad Ahmed Sami and Talha Bin Emran

Table S1. The selected ligands.

| Serial No | Ligand                                                 | Pubchem CID   | References |
|-----------|--------------------------------------------------------|---------------|------------|
| 1         | (8)-Shogaol                                            | CID_6442560   | [1]        |
| 2         | Desmethoxycurcumin                                     | CID_5469424   | [2,3]      |
| 3         | Tetrahydro curcumin                                    | CID_56965746  | [2]        |
| 4         | 6-Dehydrogingerdione                                   | CID_22321203  | [4]        |
| 5         | Difluorinated curcumin                                 | CID_54597187  | [5]        |
| 6         | EAC                                                    | CID_8868      | [6]        |
| 7         | DM1                                                    | CID_11343137  | [7]        |
| 8         | Chalcone                                               | CID_637760    | [8]        |
| 9         | Cyclovalone                                            | CID_1550234   | [9]        |
| 10        | Curcumin PE                                            | CID_5281767   | [10]       |
| 11        | Salsalate                                              | CID_5161      | [11]       |
| 12        | Go-Y016                                                | CID_1550385   | [12]       |
| 13        | Petasiphenol                                           | CID_6438779   | [13]       |
| 14        | Benzyl ferulate                                        | CID_7766335   | [14]       |
| 15        | Calebin A                                              | CID_637429    | [15]       |
| 16        | ACMC-1AEIO                                             | CID_2889      | [16]       |
| 17        | MFCD00012210                                           | CID_14121     | [17]       |
| 18        | Khi-201                                                | CID_99844     | [18]       |
| 19        | Go-Y032                                                | CID_1714173   | [19]       |
| 20        | 3,3'-dimethoxystilbene-4,4'-diol                       | CID_5280698   | [20]       |
| 21        | AO-002                                                 | CID_5318278   | [21]       |
| 22        | phenylethyl-trans-isoferulate                          | CID_5468215   | [22]       |
| 23        | NSC-43319                                              | CID_5470829   | [23]       |
| 24        | 3,4-dimethoxy-4'-hydroxychalcone                       | CID_5930244   | [24]       |
| 25        | PHSK                                                   | CID_6123890   | [25]       |
| 26        | Go-Y022                                                | CID_6474893   | [26]       |
| 27        | BRD-89483                                              | CID_6477637   | [23]       |
| 28        | 3,3'-dimethoxy-cis-stilbene-4,4'-diol                  | CID_9548762   | [27]       |
| 29        | CHEMBL482607                                           | CID_10904292  | [28]       |
| 30        | ZINC100190381                                          | CID_11895692  | [29]       |
| 31        | SCHEMBL18672270                                        | CID_16087306  | [30]       |
| 32        | EI-135                                                 | CID_16760039  | [30]       |
| 33        | 3,4'-Dimethoxystilbene-4-ol                            | CID_23652110  | [31]       |
| 34        | BDBM149243                                             | CID_44538441  | [30]       |
| 35        | Go-Y078                                                | CID_46231908  | [32]       |
| 36        | CHEMBL3940632                                          | CID_68556085  | [30]       |
| 37        | CHEMBL494826                                           | CID_71717791  | [30]       |
| 38        | SCHEMBL1374497                                         | CID_86590085  | [33]       |
| 39        | CHEMBL3290186                                          | CID_90644814  | [30]       |
| 40        | BDBM145855                                             | CID_91809442  | [30]       |
| 41        | BDBM145853                                             | CID_91809620  | [30]       |
| 42        | 1,5-Bis(4-hydroxy-3-methoxyphenyl)-1,4-pentadien-3-one | CID_131752986 | [26]       |
| 43        | Coniferyl ferulate                                     | CID_6441913   | [34]       |

|    |                                      |              |         |
|----|--------------------------------------|--------------|---------|
| 44 | Curcumin sulfate                     | CID_66645351 | [3]     |
| 45 | Dihydrocurcumin                      | CID_10429233 | [3]     |
| 46 | Dimethoxycurcumin                    | CID_9952605  | [2]     |
| 47 | Dimethylcurcumin                     | CID_6477182  | [35]    |
| 48 | Ethyl curcumin                       | CID_11474949 | [36]    |
| 49 | Griffithane D                        | CID_56597215 | [37]    |
| 50 | Monodemethylcurcumin                 | CID_5469426  | [38]    |
| 51 | Phenylethyl 3-methylcaffeate         | CID_5284444  | [39]    |
| 52 | p-Hydroxyphenethyl trans-ferulate    | CID_637308   | [40]    |
| 53 | Piperkadsin A                        | CID_11717379 | [41]    |
| 54 | Shogaol                              | CID_5281794  | [3]     |
| 55 | Tetrahydrocurcumin                   | CID_124072   | [2]     |
| 56 | Tetrahydrodemethoxydiferuloylmethane | CID_9906039  | [42]    |
| 57 | Tetramethylcurcumin                  | CID_11487078 | [43]    |
| 58 | Wallichinine                         | CID_5315280  | [44]    |
| 59 | 6-paradol                            | 94378        | [45,46] |
| 60 | Bisdemethoxycurcumin                 | 5315472      | [2,3]   |
| 61 | Cassumunin A                         | 10460395     | [47]    |
| 62 | Cassumunin B                         | 10054109     | [47]    |
| 63 | Curcumin                             | 969516       | [2,48]  |
| 64 | Cyclocurcumin                        | 69879809     | [49]    |
| 65 | Dehydrozingerone                     | 5354238      | [50]    |
| 66 | Dibenzoylmethane                     | 8433         | [51]    |
| 67 | 6-Gingerol                           | 442793       | [3,45]  |
| 68 | Isoeugenol                           | 853433       | [52]    |
| 69 | Yakuchinone A                        | 133145       | [53]    |
| 70 | Yakuchinone B                        | 6440365      | [53]    |

Table S2. Drug likeliness properties of the ligands.

| SL No | Compound Name          | MW (g/mol) | miLogP | HBA  | HBD | nROTB | TPSA (Å <sup>2</sup> ) | Lipinski Violation |
|-------|------------------------|------------|--------|------|-----|-------|------------------------|--------------------|
| Rule  |                        | <500       | ≤ 5    | < 10 | < 5 | ≤ 10  |                        |                    |
| 01    | 6-Gingerol             | 294.39     | 3.22   | 4    | 2   | 10    | 66.76                  | 0                  |
| 02    | 6-Paradol              | 278.39     | 4.60   | 3    | 1   | 9     | 46.53                  | 0                  |
| 03    | Bisdemethoxycurcumin   | 276.38     | 2.67   | 4    | 2   | 6     | 74.60                  | 0                  |
| 04    | Cassumunin A           | 558.63     | 4.96   | 8    | 2   | 13    | 111.53                 | 1                  |
| 05    | Cassumunin B           | 588.65     | 4.77   | 9    | 2   | 14    | 120.77                 | 1                  |
| 06    | Curcumin               | 368.38     | 2.30   | 6    | 2   | 8     | 93.07                  | 0                  |
| 07    | Cyclocurcumin          | 368.38     | 3.03   | 6    | 2   | 5     | 85.23                  | 0                  |
| 08    | Dehydrozingerone       | 192.21     | 1.55   | 3    | 1   | 3     | 46.53                  | 0                  |
| 09    | Demethoxycurcumin      | 338.36     | 2.48   | 5    | 2   | 7     | 83.83                  | 0                  |
| 10    | Dibenzoylmethane       | 224.26     | 2.88   | 2    | 0   | 4     | 34.14                  | 0                  |
| 11    | Isoeugenol             | 164.20     | 2.38   | 2    | 1   | 2     | 29.46                  | 0                  |
| 12    | Yakuchinone A          | 312.41     | 4.24   | 3    | 1   | 9     | 46.53                  | 0                  |
| 13    | Yakuchinone B          | 310.39     | 4.27   | 3    | 1   | 8     | 46.53                  | 0                  |
| 14    | (8)-Shogaol            | 304.4      | 5.36   | 3    | 1   | 11    | 46.5                   | 1                  |
| 15    | Desmethoxycurcumin     | 338.4      | 3.3    | 5    | 2   | 7     | 83.8                   | 0                  |
| 16    | Tetrahydrocurcumin     | 372.42     | 2.24   | 6    | 2   | 10    | 93.07                  | 0                  |
| 17    | 6-Dehydrogingerdione   | 290.36     | 3.81   | 4    | 2   | 8     | 66.76                  | 0                  |
| 18    | Difluorinated curcumin | 492.47     | 4.58   | 6    | 2   | 9     | 93.07                  | 0                  |
| 19    | EAC                    | 130.14     | 0.06   | 3    | 0   | 4     | 43.38                  | 0                  |
| 20    | DM1                    | 738.30     | 3.45   | 13   | 2   | 8     | 156.48                 | 2                  |
| 21    | Chalcone               | 208.26     | 3.81   | 1    | 0   | 3     | 17.07                  | 0                  |
| 22    | Cyclovalone            | 366.41     | 3.65   | 5    | 2   | 4     | 76.00                  | 0                  |
| 23    | Curcumin PE            | 368.38     | 3.05   | 6    | 3   | 7     | 96.22                  | 0                  |
| 24    | Salsalate              | 258.23     | 3.77   | 5    | 2   | 4     | 83.83                  | 0                  |
| 25    | Go-Y016                | 414.45     | 3.45   | 7    | 0   | 10    | 72.47                  | 0                  |
| 26    | Petasiphenol           | 344.32     | 1.56   | 7    | 4   | 7     | 124.29                 | 0                  |
| 27    | Benzyl ferulate        | 284.31     | 3.46   | 4    | 1   | 6     | 55.77                  | 0                  |
| 28    | Calebin A              | 384.38     | 2.73   | 7    | 2   | 9     | 102.30                 | 0                  |
| 29    | ACMC-1AEIO             | 368.38     | 2.30   | 6    | 2   | 8     | 93.07                  | 0                  |
| 30    | MFCD00012210           | 192.21     | 1.55   | 3    | 1   | 3     | 46.53                  | 0                  |
| 31    | Khi-201                | 230.22     | 1.12   | 4    | 1   | 2     | 63.60                  | 0                  |

|    |                                                            |        |       |   |   |    |        |   |
|----|------------------------------------------------------------|--------|-------|---|---|----|--------|---|
| 32 | Go-Y032                                                    | 394.47 | 4.26  | 5 | 0 | 6  | 54.01  | 0 |
| 33 | 3,3'-dimethoxystilbene-4,4'-diol                           | 356.37 | 2.78  | 6 | 0 | 8  | 71.08  | 0 |
| 34 | AO-002                                                     | 310.39 | 3.98  | 3 | 1 | 8  | 46.53  | 0 |
| 35 | Phenylethyl-trans<br>isoferulate                           | 298.34 | 3.67  | 4 | 1 | 7  | 55.77  | 0 |
| 36 | NSC-43319                                                  | 352.39 | 3.14  | 5 | 2 | 4  | 76.00  | 0 |
| 37 | 3,4-dimethoxy-4'-hydroxychalcone                           | 284.31 | 3.21  | 4 | 1 | 5  | 55.77  | 0 |
| 38 | PHSK                                                       | 254.28 | 3.15  | 3 | 1 | 4  | 46.53  | 0 |
| 39 | Go-Y022                                                    | 326.35 | 2.86  | 5 | 2 | 6  | 76.00  | 0 |
| 40 | BRD-89483                                                  | 352.39 | 3.14  | 5 | 2 | 4  | 76.00  | 0 |
| 41 | 3,3'-dimethoxy-cis-stilbene-4,4'-diol                      | 272.30 | 3.17  | 4 | 2 | 4  | 58.92  | 0 |
| 42 | CHEMBL482607                                               | 352.39 | 3.38  | 5 | 2 | 7  | 76.00  | 0 |
| 43 | ZINC100190381                                              | 372.42 | 2.99  | 6 | 3 | 9  | 96.22  | 0 |
| 44 | SCHEMBL18672270                                            | 428.46 | 3.92  | 6 | 2 | 11 | 85.23  | 1 |
| 45 | EI-135                                                     | 368.38 | 2.30  | 6 | 2 | 8  | 93.07  | 0 |
| 46 | 3,4'-Dimethoxystilbene-4-ol                                | 256.30 | 3.89  | 3 | 1 | 4  | 38.70  | 0 |
| 47 | BDBM149243                                                 | 372.80 | 2.91  | 5 | 2 | 7  | 83.83  | 0 |
| 48 | Go-Y078                                                    | 400.43 | 3.17  | 7 | 1 | 9  | 83.47  | 0 |
| 49 | CHEMBL3940632                                              | 368.38 | 2.07  | 6 | 2 | 8  | 93.07  | 0 |
| 50 | CHEMBL494826                                               | 382.41 | 3.35  | 6 | 2 | 8  | 85.23  | 0 |
| 51 | SCHEMBL1374497                                             | 382.41 | 2.68  | 6 | 2 | 9  | 93.07  | 0 |
| 52 | CHEMBL3290186                                              | 362.33 | 3.50  | 5 | 2 | 6  | 76.00  | 0 |
| 53 | BDBM145855                                                 | 406.36 | 3.77  | 5 | 2 | 8  | 83.83  | 0 |
| 54 | BDBM145853                                                 | 440.45 | 2.47  | 8 | 1 | 12 | 108.38 | 0 |
| 55 | 1,5-Bis(4-hydroxy-3-methoxyphenyl)-<br>1,4-pentadien-3-one | 326.35 | 2.86  | 5 | 2 | 6  | 76.00  | 0 |
| 56 | Coniferyl ferulate                                         | 356.37 | 3.56  | 6 | 2 | 8  | 85.23  | 0 |
| 57 | Curcumin sulfate                                           | 448.45 | -0.14 | 9 | 2 | 10 | 136.44 | 0 |
| 58 | Dihydrocurcumin                                            | 370.40 | 2.27  | 6 | 2 | 9  | 93.07  | 0 |
| 59 | Dimethoxycurcumin                                          | 396.44 | 2.92  | 6 | 0 | 10 | 71.08  | 0 |
| 60 | Dimethylcurcumin                                           | 396.44 | 3.66  | 6 | 1 | 9  | 74.23  | 0 |
| 61 | Ethyl curcumin                                             | 396.44 | 3.06  | 6 | 2 | 10 | 93.07  | 0 |
| 62 | Griffithane D                                              | 302.33 | 1.87  | 5 | 1 | 6  | 72.84  | 0 |
| 63 | Monodemethylcurcumin                                       | 354.36 | 2.00  | 6 | 3 | 7  | 104.06 | 0 |
| 64 | Phenylethyl 3-methylcaffeate                               | 298.34 | 3.67  | 4 | 1 | 7  | 55.77  | 0 |
| 65 | p-Hydroxyphenethyl trans-ferulate                          | 314.34 | 3.19  | 5 | 2 | 7  | 76.00  | 0 |
| 66 | Piperkadsin A                                              | 356.42 | 2.51  | 5 | 1 | 7  | 65.00  | 0 |
| 67 | Shogaol                                                    | 276.38 | 4.35  | 3 | 1 | 9  | 46.53  | 0 |
| 68 | Tetrahydrocurcumin                                         | 372.42 | 2.24  | 6 | 2 | 10 | 93.07  | 0 |
| 69 | Tetrahydrodemethoxydiferuloylmetha<br>ne                   | 342.39 | 2.43  | 5 | 2 | 9  | 83.83  | 0 |
| 70 | Tetramethylcurcumin                                        | 424.49 | 3.81  | 6 | 0 | 10 | 71.08  | 0 |
| 71 | Wallichinine                                               | 370.44 | 2.82  | 5 | 0 | 8  | 54.01  | 0 |

(HBA: hydrogen bond acceptors; HBD: hydrogen bond donors; nROTB: number of rotatable bonds; TPSA: topological polar surface area).

**Table S3.** ADME/T result of controls.

| Ligand                      | Clavulanic Acid | Tazobactam | Carbapenem | Cephalosporin |
|-----------------------------|-----------------|------------|------------|---------------|
| Human Intestinal Absorption | High            | Low        | Low        | Low           |
| Human Oral Bioavailability  | High            | High       | High       | Low           |
| Caco - 2 Permeability       | Low             | Low        | High       | Low           |
| P glycoprotein substrate    | No              | No         | Yes        | Yes           |
| P glycoprotein inhibitor    | No              | No         | No         | No            |
| Blood-Brain-Barrier         | No              | No         | No         | No            |
| CYP3A4 substrate            | No              | Yes        | No         | No            |
| CYP3C9 substrate            | No              | No         | No         | No            |
| CYP2D6 substrate            | No              | No         | No         | No            |
| CYP3A4 inhibitor            | No              | No         | No         | No            |
| CYP3C9 inhibitor            | No              | No         | No         | No            |
| CYP2D6 inhibitor            | No              | No         | No         | No            |
| Total Clearance             | 0.533           | 0.947      | 0.352      | -0.012        |
| OCT2 substrate              | No              | No         | No         | No            |
| AMES Toxicity               | No              | No         | No         | No            |
| Hepatotoxicity              | yes             | Yes        | No         | Yes           |
| hERG inhibition             | No              | No         | Yes        | No            |

|                     |          |          |          |          |
|---------------------|----------|----------|----------|----------|
| Eye irritation      | No       | No       | Yes      | No       |
| Acute oral toxicity | Type III | Type III | Type III | Type III |
| Carcinogenicity     | No       | No       | No       | No       |

Table S4. ADME/T prediction results

| Ligand                      | Go-Y032  | NSC-43319 | Salsalate | Petasiphenol | Diffuorinated Curcumin | Cyclocurc Umin | Cyclovalone |
|-----------------------------|----------|-----------|-----------|--------------|------------------------|----------------|-------------|
| <b>Absorption</b>           |          |           |           |              |                        |                |             |
| Human Intestinal Absorption | High     | High      | High      | High         | High                   | High           | High        |
| Human Oral Bioavailability  | High     | High      | High      | Low          | High                   | Low            | High        |
| Caco - 2 Permeability       | High     | High      | Low       | Low          | Low                    | Low            | Low         |
| <b>Distribution</b>         |          |           |           |              |                        |                |             |
| P glycoprotein substrate    | No       | Yes       | No        | Yes          | Yes                    | No             | Yes         |
| P glycoprotein inhibitor    | Yes      | Yes       | No        | No           | Yes                    | Yes            | Yes         |
| Blood-Brain-Barrier         | Yes      | Yes       | Yes       | No           | Yes                    | No             | Yes         |
| <b>Metabolism</b>           |          |           |           |              |                        |                |             |
| CYP3A4 substrate            | Yes      | Yes       | No        | Yes          | Yes                    | Yes            | No          |
| CYP3C9 substrate            | Yes      | No        | No        | Yes          | Yes                    | Yes            | No          |
| CYP2D6 substrate            | No       | No        | No        | No           | No                     | No             | No          |
| CYP3A4 inhibitor            | Yes      | Yes       | No        | No           | Yes                    | No             | Yes         |
| CYP3C9 inhibitor            | Yes      | Yes       | No        | No           | Yes                    | No             | Yes         |
| CYP2D6 inhibitor            | No       | No        | No        | No           | No                     | No             | No          |
| <b>Excretion</b>            |          |           |           |              |                        |                |             |
| Total Clearance             | 0.176    | 0.039     | 0.52      | −0.012       | 0.424                  | 0.072          | 0.047       |
| OCT2 substrate              | No       | No        | No        | No           | No                     | No             | No          |
| AMES Toxicity               | No       | No        | No        | No           | No                     | No             | No          |
| Hepatotoxicity              | No       | No        | No        | No           | Yes                    | Yes            | No          |
| hERG inhibition             | Yes      | Yes       | Yes       | Yes          | Yes                    | Yes            | Yes         |
| Eye irritation              | No       | No        | Yes       | No           | No                     | No             | No          |
| Acute oral toxicity         | Type III | Type III  | Type III  | Type III     | Type III               | Type III       | Type III    |
| Carcinogenicity             | No       | No        | No        | No           | No                     | No             | No          |

Table S5. Pharmacological activities

| Activities                      | Go-Y032 |       | NSC-43319 |       | Salsalate |       | Petasiphenol |       | Diffuorinated Curcumin |       | Cyclocurcumin |        | Cyclovalone |       |
|---------------------------------|---------|-------|-----------|-------|-----------|-------|--------------|-------|------------------------|-------|---------------|--------|-------------|-------|
|                                 | Pa      | Pi    | Pa        | Pi    | Pa        | Pi    | Pa           | Pi    | Pa                     | Pi    | Pa            | Pi     | Pa          | Pi    |
| Antibacterial                   | 0.237   | 0.091 | 0.312     | 0.056 | 0.416     | 0.026 | 0.202        | 0.116 | —                      | —     | 0.423         | 0.025  | 0.298       | 0.061 |
| Bacterial Efflux Pump Inhibitor | 0.154   | 0.012 | 0.154     | 0.011 | —         | —     | —            | —     | 0.181                  | 0.004 | 0.145         | 0.02 2 | 0.149       | 0.017 |
| Antibiotic                      | 0.105   | 0.061 | —         | —     | 0.109     | 0.055 | —            | —     | —                      | —     | —             | —      | 0.122       | 0.037 |
| Anthracycline like              | 0.118   | 0.070 | 0.133     | 0.055 | 0.234     | 0.012 | —            | —     | —                      | —     | —             | —      | 0.128       | 0.060 |
| Beta-lactamase Inibitor         | 0.489   | 0.020 | 0.544     | 0.014 | —         | —     | 0.282        | 0.092 | 0.306                  | 0.077 | —             | —      | 0.534       | 0.015 |
| Anti-micobacterial              | —       | —     | —         | —     | 0.210     | 0.026 | —            | —     | —                      | —     | 0.112         | 0.071  | 0.093       | 0.089 |

—indicates no activity

Table S6. Biological activities

| Activities              | Go-Y032 | NSC-43319 | Salsalate | Petasiphenol | Diffuorinated Curcumin | Cyclocurcumin | Cyclovalone |
|-------------------------|---------|-----------|-----------|--------------|------------------------|---------------|-------------|
| GPCR ligand             | −0.12   | −0.26     | −0.21     | −0.06        | −0.10                  | −0.04         | −0.10       |
| Ion channel modulator   | −0.27   | −0.21     | −0.06     | −0.17        | −0.26                  | −0.31         | −0.25       |
| Kinase inhibitor        | −0.32   | −0.33     | −0.28     | −0.31        | −0.18                  | 0.28          | −0.31       |
| Nuclear receptor ligand | −0.09   | 0.01      | 0.05      | 0.17         | −0.05                  | 0.10          | −0.02       |

|                    |       |       |       |      |       |       |       |
|--------------------|-------|-------|-------|------|-------|-------|-------|
| Protease inhibitor | -0.08 | -0.11 | -0.29 | 0.08 | -0.14 | -0.11 | -0.08 |
| Enzyme inhibitor   | -0.03 | 0.02  | -0.00 | 0.08 | -0.03 | 0.09  | 0.02  |

## References

1. Nurtjahja-Tjendraputra, E.; Ammit, A.J.; Roufogalis, B.D.; Tran, V.H.; Duke, C.C. Effective anti-platelet and COX-1 enzyme inhibitors from pungent constituents of ginger. *Thromb. Res.* **2003**, *111*, 259–265.
2. Sandur, S.K.; Pandey, M.K.; Sung, B.; Ahn, K.S.; Murakami, A.; Sethi, G.; Limtrakul, P.; Badmaev, V.; Aggarwal, B.B. Curcumin, demethoxycurcumin, bisdemethoxycurcumin, tetrahydrocurcumin and turmerones differentially regulate anti-inflammatory and anti-proliferative responses through a ROS-independent mechanism. *Carcinogenesis* **2007**, *28*, 1765–1773.
3. Park, S.-J.; Lee, M.-Y.; Son, B.-S.; Youn, H.-S. TBK1-targeted suppression of TRIF-dependent signaling pathway of Toll-like receptors by 6-shogaol, an active component of ginger. *Biosci Biotechnol Biochem.* **2009**, *73*, 1474–1478.
4. Liu, C.-M.; Kao, C.-L.; Tseng, Y.-T.; Lo, Y.-C.; Chen, C.-Y. Ginger phytochemicals inhibit cell growth and modulate drug resistance factors in docetaxel resistant prostate cancer cell. *Molecules* **2017**, *22*, 1477.
5. Abbas Momtazi, A.; Sahebkar, A. Difluorinated curcumin: a promising curcumin analogue with improved anti-tumor activity and pharmacokinetic profile. *Curr. Pharm. Design* **2016**, *22*, 4386–4397.
6. Nofal, Z.M.; Fahmy, H.H.; Zarea, E.S.; El-Eraky, W. Synthesis of new pyrimidine derivatives with evaluation of their anti-inflammatory and analgesic activities. *Acta Pol. Pharm.* **2011**, *68*, 507–517.
7. Gébleux, R.; Wulhfard, S.; Casi, G.; Neri, D. Antibody format and drug release rate determine the therapeutic activity of noninternalizing antibody–drug conjugates. *Mol. Cancer Ther.* **2015**, *14*, 2606–2612.
8. Sudhakar, C.; Suresh, J.; Valarmathi, N.; Sumathi, S.; Karthikeyan, A.; Arun, A. Synthesis, characterization of acrylate polymer having chalcone moiety: evaluation of antimicrobial, anticancer and drug release study. *J. Biomater Sci. Polym. Polymer Edition* **2020**, *32*, 438–453.
9. Haukvik, T.; Bruzell, E.; Kristensen, S.; Tønnesen, H. A screening of curcumin derivatives for antibacterial phototoxic effects Studies on curcumin and curcuminoids. XLIII. *J. Pharm. Sci.* **2011**, *66*, 69–74.
10. Elmsellem, H.; Youssouf, M.; Aouniti, A.; Hadda, T.B.; Chetouani, A.; Hammouti, B. Adsorption and inhibition effect of curcumin on mild steel corrosion in hydrochloric acid. *Russ. J. Appl. Chem.* **2014**, *87*, 744–753.
11. Yang, Z.; Niu, Y.; Le, Y.; Ma, X.; Qiao, C. Beta-lactamase inhibitory component from the roots of *Fissistigma cavaleriei*. *Phytomedicine* **2010**, *17*, 139–141.
12. Chantrapromma, S.; Ruanwas, P.; Boonnak, N.; Chantrapromma, K.; Fun, H.-K. Synthesis, antityrosinase activity of curcumin analogues, and crystal structure of (1 E, 4 E)-1, 5-bis (4-ethoxyphenyl) penta-1, 4-dien-3-one. *Crystallogr. Rep.* **2016**, *61*, 1081–1085.
13. Ou, J.L.; Mizushima, Y.; Wang, S.Y.; Chuang, D.Y.; Nadar, M.; Hsu, W.L. Structure – activity relationship analysis of curcumin analogues on anti - influenza virus activity. *FEBS J* **2013**, *280*, 5829–5840.
14. Hegazi, A.G.; Abd El Hady, F.K.; Abd Allah, F.A. Chemical composition and antimicrobial activity of European propolis. *Z. Phys. C* **2000**, *55*, 70–75.
15. Buhrmann, C.; Shayan, P.; Banik, K.; Kunnumakkara, A.B.; Kubatka, P.; Koklesova, L.; Shakibaei, M. Targeting NF-κB signaling by calebin a, a compound of turmeric, in multicellular tumor microenvironment: potential role of apoptosis induction in CRC cells. *Biomedicines* **2020**, *8*, 236.
16. Liu, Y.; Cai, Y.; Jiang, X.; Wu, J.; Le, X. Molecular interactions, characterization and antimicrobial activity of curcumin–chitosan blend films. *Food Hydrocoll.* **2016**, *52*, 564–572.
17. Kubra, I.R.; Bettadaiah, B.K.; Murthy, P.S.; Rao, L.J. Structure-function activity of dehydrozingerone and its derivatives as antioxidant and antimicrobial compounds. *J. Food Prot. Technol.* **2014**, *51*, 245–255, doi:10.1007/s13197-011-0488-8.
18. Hori, H.; Maezawa, H.; Iitaka, Y.; Ohsaka, T.; Shibata, T.; Mori, T.; Inayama, S. 2-Arylidene-4-cyclopentene-1,3-diones designed as non-nitro radiosensitizers and hypoxic cytotoxins. *Jpn. J. Cancer Res.* **1987**, *78*, 1128–1133.
19. Mapoung, S.; Pitchakarn, P.; Yodkeeree, S.; Ovatarnporn, C.; Sakorn, N.; Limtrakul, P. Chemosensitizing effects of synthetic curcumin analogs on human multi-drug resistance leukemic cells. *Chem. Biol. Interact.* **2016**, *244*, 140–148, doi:10.1016/j.cbi.2015.12.001.
20. Benayahoum, A.; Amira-Guebailia, H.; Houache, O. A DFT method for the study of the antioxidant action mechanism of resveratrol derivatives. *J. Mol. Model.* **2013**, *19*, 2285–2298.
21. Dong, G.Z.; Jeong, J.H.; Lee, Y.-i.; Lee, S.Y.; Zhao, H.-Y.; Jeon, R.; Lee, H.J.; Ryu, J.-H. Diarylheptanoids suppress proliferation of pancreatic cancer PANC-1 cells through modulating shh-Gli-FoxM1 pathway. *Arch. Pharmacol. Res.* **2017**, *40*, 509–517.
22. Shen, H.; Yamashita, A.; Nakakoshi, M.; Yokoe, H.; Sudo, M.; Kasai, H.; Tanaka, T.; Fujimoto, Y.; Ikeda, M.; Kato, N. Inhibitory effects of caffeic acid phenethyl ester derivatives on replication of hepatitis C virus. *PLoS One* **2013**, *8*, e82299.
23. Chang, J.-Y.; Hsieh, H.-P.; Pan, W.-Y.; Liou, J.-P.; Bey, S.-J.; Chen, L.-T.; Liu, J.-F.; Song, J.-S. Dual inhibition of topoisomerase I and tubulin polymerization by BPR0Y007, a novel cytotoxic agent. *Biochem. Pharmacol.* **2003**, *65*, 2009–2019.
24. Raghavan, S.; Manogaran, P.; Kuppuswami, B.K.; Venkatraman, G.; Narasimha, K.K.G. Synthesis and anticancer activity of chalcones derived from vanillin and isovanillin. *Med. Chem. Res.* **2015**, *24*, 4157–4165.
25. Kucerova-Chlupacova, M.; Dosedel, M.; Kunes, J.; Soltesova-Prnova, M.; Majekova, M.; Stefek, M. Chalcones and their pyrazine analogs: synthesis, inhibition of aldose reductase, antioxidant activity, and molecular docking study. *Monatsh. Chem.* **2018**, *149*, 921–929.

26. Prehm, P. Curcumin analogue identified as hyaluronan export inhibitor by virtual docking to the ABC transporter MRP5. *Food Chem. Toxicol.* **2013**, *62*, 76–81.
27. Yannai, S. *Dictionary of food compounds with CD-ROM*; Crc Press: Boca Raton, London **2012**.
28. Changtam, C.; Hongmanee, P.; Suksamrarn, A. Isoxazole analogs of curcuminoids with highly potent multidrug-resistant antimycobacterial activity. *Eur. J. Med. Chem.* **2010**, *45*, 4446–4457.
29. Matsuda, H.; Ando, S.; Kato, T.; Morikawa, T.; Yoshikawa, M. Inhibitors from the rhizomes of *Alpinia officinarum* on production of nitric oxide in lipopolysaccharide-activated macrophages and the structural requirements of diarylheptanoids for the activity. *Bioorg. Med. Chem.* **2006**, *14*, 138–142.
30. National Center for Biotechnology Information. Available online: [https://en.wikipedia.org/wiki/National\\_Center\\_for\\_Biotechnology\\_Information](https://en.wikipedia.org/wiki/National_Center_for_Biotechnology_Information) (accessed on 21 December 2021).
31. Allen, C.C.R.; Ellinger, J.; Ewing, T.; de Gonzalo Calvo, G. *Science of Synthesis: Biocatalysis in Organic Synthesis Vol. 3*; Georg Thieme Verlag: 2015; Volume 3.
32. Murakami, M.; Ohnuma, S.; Fukuda, M.; Chufan, E.E.; Kudoh, K.; Kanehara, K.; Sugisawa, N.; Ishida, M.; Naitoh, T.; Shibata, H. Synthetic analogs of curcumin modulate the function of multidrug resistance-linked ATP-binding cassette transporter ABCG2. *Drug Metab. Dispos.* **2017**, *45*, 1166–1177.
33. Shahiduzzaman, M.; Dausgies, A. Curcumin: a natural herb extract with antiparasitic properties. In *Nature Helps*. Springer, Berlin, Heidelberg **2011**; pp. 141–152.
34. Grabber, J.H.; Hatfield, R.D.; Lu, F.; Ralph, J. Coniferyl ferulate incorporation into lignin enhances the alkaline delignification and enzymatic degradation of cell walls. *Biomacromolecules* **2008**, *9*, 2510–2516.
35. Funk, J.L.; Oyarzo, J.N.; Frye, J.B.; Chen, G.; Lantz, R.C.; Jolad, S.D.; Sólyom, A.M.; Timmermann, B.N. Turmeric extracts containing curcuminoids prevent experimental rheumatoid arthritis. *J. Nat. Prod.* **2006**, *69*, 351–355.
36. Al-Wabli, R.I.; AboulWafa, O.M.; Youssef, K.M. Synthesis of curcumin and ethylcurcumin bioconjugates as potential antitumor agents. *Med. Chem. Res.* **2012**, *21*, 874–890.
37. Moosophon, P.; Kanokmedhakul, S.; Kanokmedhakul, K. Diarylpropanes and an arylpropyl quinone from *Combretum griffithii*. *J. Nat. Prod.* **2011**, *74*, 2216–2218.
38. Ahmad, R.S.; Hussain, M.B.; Sultan, M.T.; Arshad, M.S.; Waheed, M.; Shariati, M.A.; Plygun, S.; Hashempur, M.H. Biochemistry, safety, pharmacological activities, and clinical applications of turmeric: a mechanistic review. *Evid. Based. Complement. Alternat. Med.* **2020**, 2020.
39. Wang, J.-Z.; Yan, C.-H.; Zhang, X.-R.; Tu, Q.-B.; Xu, Y.; Sheng, S.; Wu, F.-A.; Wang, J. A novel nanoparticle loaded with methyl caffeate and caffeic acid phenethyl ester against *Ralstonia solanacearum*—a plant pathogenic bacteria. *RSC Adv.* **2020**, *10*, 3978–3990.
40. Casu, L.; Cottiglia, F.; Leonti, M.; De Logu, A.; Agus, E.; Tse-Dinh, Y.-C.; Lombardo, V.; Sissi, C. Ungeremine effectively targets mammalian as well as bacterial type I and type II topoisomerases. *Bioorg. Med. Chem. Lett.* **2011**, *21*, 7041–7044.
41. Lin, L.-C.; Shen, C.-C.; Shen, Y.-C.; Tsai, T.-H. Anti-inflammatory Neolignans from *Piper kadsura*. *J. Nat. Prod.* **2006**, *69*, 842–844.
42. Arunkhamkaew, S.; Athipornchai, A.; Apiratikul, N.; Suksamrarn, A.; Ajavakom, V. Novel racemic tetrahydrocurcuminoid dihydropyrimidinone analogues as potent acetylcholinesterase inhibitors. *Bioorg. Med. Chem. Lett.* **2013**, *23*, 2880–2882.
43. Singh, B.K.; Bisht, S.S.; Tripathi, R.P. An efficient synthesis of tetramic acid derivatives with extended conjugation from L-Ascorbic Acid. *Beilstein J. Org. Chem.* **2006**, *2*, 24.
44. Duan, S.; Zhang, P.; Yu, P. Neolignans and lignan from *Piper wallichii*. *China J. Chin. Mater. Med.* **2010**, *35*, 180–182.
45. Kim, S.O.; Kundu, J.K.; Shin, Y.K.; Park, J.-H.; Cho, M.-H.; Kim, T.-Y.; Surh, Y.-J. [6]-Gingerol inhibits COX-2 expression by blocking the activation of p38 MAP kinase and NF- $\kappa$ B in phorbol ester-stimulated mouse skin. *Oncogene* **2005**, *24*, 2558–2567.
46. Keum, Y.-S.; Kim, J.; Lee, K.H.; Park, K.K.; Surh, Y.-J.; Lee, J.M.; Lee, S.-S.; Yoon, J.H.; Joo, S.Y.; Cha, I.H. Induction of apoptosis and caspase-3 activation by chemopreventive [6]-paradol and structurally related compounds in KB cells. *Cancer Lett.* **2002**, *177*, 41–47.
47. Masuda, T.; Matsumura, H.; Oyama, Y.; Takeda, Y.; Jitoe, A.; Kida, A.; Hidaka, K. Synthesis of ( $\pm$ )-cassumunins A and B, new curcuminoid antioxidants having protective activity of the living cell against oxidative damage. *J. Nat. Prod.* **1998**, *61*, 609–613.
48. Anand, P.; Thomas, S.G.; Kunnumakkara, A.B.; Sundaram, C.; Harikumar, K.B.; Sung, B.; Tharakan, S.T.; Misra, K.; Priyadarsini, I.K.; Rajasekharan, K.N. Biological activities of curcumin and its analogues (Congeners) made by man and Mother Nature. *Biochem. Pharmacol.* **2008**, *76*, 1590–1611.
49. Kiuchi, F.; Goto, Y.; Sugimoto, N.; Akao, N.; Kondo, K.; Tsuda, Y. Nematocidal activity of turmeric: synergistic action of curcuminoids. *Chem. Pharm. Bull.* **1993**, *41*, 1640–1643, doi:10.1248/cpb.41.1640.
50. Yogosawa, S.; Yamada, Y.; Yasuda, S.; Sun, Q.; Takizawa, K.; Sakai, T. Dehydrozingerone, a structural analogue of curcumin, induces cell-cycle arrest at the G2/M phase and accumulates intracellular ROS in HT-29 human colon cancer cells. *J. Nat. Prod.* **2012**, *75*, 2088–2093.
51. Lin, C.-C. Mechanistic Studies on the Inhibitory Action of Dietary Dibenzoylmethane, a Be-ta-Diketone Analogue of Curcumin, on 7,12-Dimethylbenz[a]Anthracene-Induced Mammary Tumorigenesis. Rutgers The State University of New Jersey - New Brunswick. ProQuest Dissertations Publishing, 2000.
52. Fujisawa, S.; Atsumi, T.; Ishihara, M.; Kadoma, Y. Cytotoxicity, ROS-generation activity and radical-scavenging activity of curcumin and related compounds. *Anticancer Res.* **2004**, *24*, 563–570.

53. Flynn, D.L.; Rafferty, M.F.; Boctor, A.M. Inhibition of 5-hydroxy-eicosatetraenoic acid (5-HETE) formation in intact human neutrophils by naturally-occurring diarylheptanoids: inhibitory activities of curcuminoids and yakuchinones. *Prostaglandins leukot. med.* **1986**, *22*, 357–360.
